# Supplementary material
Source: MDPI journal article supplement (https://www.mdpi.com/2073-4433/14/7/1094)

## Supplementary Materials:

Craig A. Stroud <sup>1,\*</sup>, Junhua Zhang <sup>1</sup>, Elisa I. Boutzis <sup>1</sup>, Tianchu Zhang <sup>2</sup>, Rabab Mashayekhi <sup>3</sup>, Oumarou Nikiema <sup>3</sup>, Mahtab Majdzadeh <sup>1</sup>, Sumi N. Wren <sup>1</sup>, Xiaohong Xu <sup>2</sup> and Yushan Su <sup>4</sup>

<sup>1</sup> Air Quality Research Division, Environment and Climate Change Canada, 4905 Dufferin Street, Toronto, ON M3H 5T4, Canada; junhua.zhang@ec.gc.ca (J.Z.); elisa.boutzis@ec.gc.ca (E.I.B.); mahtab.majdzadeh@ec.gc.ca (M.M.); sumi.wren@ec.gc.ca (S.N.W.)

<sup>2</sup> Department of Civil and Environmental Engineering, University of Windsor, Windsor, ON N9B 3P4, Canada; zhang14g@uwindsor.ca (T.Z.); xxu@uwindsor.ca (X.X.)

<sup>3</sup> Meteorological Service of Canada, Environment and Climate Change Canada, Dorval, QC H9P 1J3, Canada; rabab.mashayekhi@canada.ca (R.M.); oumarou.nikiema@canada.ca (O.N.)

<sup>4</sup> Ontario Ministry of the Environmental, Conservation and Parks, Toronto, ON M9P 3V6, Canada; yushan.su@ontario.ca

\* Correspondence: craig.stroud@ec.gc.ca

The highest contributing factor was evaporative emissions, which accounted for 19% of the ambient VOC concentrations. This factor was dominated by high loadings of propane (56%) and moderate loadings of 2,4-dimethylpentane (31%), butane (24%), ethane (24%), 2,3-dimethylpentane (23%), and iso-butane (20%) (Figure S2). Propane, butane, and iso-butane are key markers of evaporative emission (Brown et al., 2007). According to the Texas Commission on Environmental Quality (TCEQ) report, butane, iso-butane, 2,3-dimethylpentane, and 2,4-dimethylpentane are mostly released into the air from natural gas industries (TECQ 2015; TECQ, 2016). Consequently, evaporative emissions are likely from propane and natural gas filling/storage facilities in Windsor and surrounding areas. For example, Plains Midstream Canada - Windsor Terminal, a company that transports, processes, and stores natural gas, released 53.4 tonnes of propane and 22 tonnes of butane air emissions in 2019. The company is approximately 2 km south of the Windsor monitoring station. Furthermore, residential use is another source of evaporative emissions. In Windsor, natural gas is widely used for home heating during cold seasons due to its affordable price. According to Canada Energy Regulator, 67% of households in Ontario used natural gas as the primary heating source in 2015 (CER, 2022). Some households also utilized natural gas stoves for cooking.

The second-highest contributing factor was industrial process and manufacturing, which accounted for 16% of the total ambient VOC concentrations. This factor is heavily loaded with industrial-related VOC species, such as 1,1,2,2-tetrachloroethane (77%), 1-heptene (45%), hexachlorobutadiene (45%), 1,2,4-trichlorobenzene (44%), 1,2-dichloropropane (42%), 1,1,2-trichloroethane (40%), 1,2-dichlorobenzene (40%), bromoform (39%), chloromethane (38%), and varieties of Freon (33–38%) (Figure S2). For example, 1,1,2,2-tetrachloroethane is released into the atmosphere during the manufacturing process of trichloroethylene and other chlorinated hydrocarbons (ATSDR, 2008). Hexachlorobutadiene is a by-product of the production of certain chemicals and is released into the air by using these chemicals (Government of Canada, 2007). 1,2,4-trichlorobenzene is mostly used as a solvent in textile manufacturing (Government of Canada, 2014). 1,2-dichloropropane is used as a chemical intermediate in several industries (EPA, 2000). In the US, most of the 1,2-dichloropropane released into the atmosphere was from manufacturing and processing facilities in 2018 (ATSDR, 2022). The primary sources of 1,1,2-trichloroethane emissions are the industries that manufacture it or use it in production (Australian Government, 2022). Freons are used as refrigerants and coolants in old refrigerators, car air conditioners, and other machines (Sciencing, 2023).

The third-highest contributing factor was vehicle exhaust 1, which accounted for 13% of the total ambient VOC concentrations. This factor is dominated by high loadings of MTBE (58%) and trichloroethylene (38%), and moderate loadings of ethylene (33%), acetylene (27%), and ethane (25%). MTBE is used almost exclusively as a fuel additive in motor

gasoline in the US (USEPA, 2016). MTBE released into the air is associated with leaking fuel storage tanks and unburned fuel from vehicle exhaust (Franklin et al., 2001). MTBE is commonly used as a tracer of gasoline vehicle emissions (Chen et al., 2014). In addition, the loading of ethylene, acetylene, and ethane in this study is similar to the profiles of ethylene (30%), acetylene (20%), and ethane (20%) from motor vehicle exhaust from a previous study (Baudic et al., 2016).

The sixth-highest contributing factor was gasoline storage, which accounted for 10% of the total ambient VOC concentrations. This factor is dominated by high loadings of 2,2,4-trimethylpentane (38%) and moderate loadings of 2,4-dimethylpentane (33%) and styrene (33%). 2,2,4-trimethylpentane is one of the several isomers of octane (C<sub>8</sub>H<sub>18</sub>). It is an important component of gasoline (University of Waterloo, 2016). 2,4-dimethylpentane is an isomer of heptane, which can be found in gasoline (TCEQ, 2016). The profile of 2,2,4-trimethylpentane and styrene in this study is similar to the profile of gasoline production and storage (McCarthy et al., 2013).

The fifth-highest contributing factor was vehicle exhaust 2, which accounted for 11% of the total ambient VOC concentrations. This factor is characterized by high loadings of trans-2-butene (67%), cis-2-butene (55%), and butane (45%), and moderate loadings of 2-methyl-2-butene (36%), trans-2-pentene (32%), and cis-2-pentene (27). The combustion of gasoline is a major mechanism for the release of butane into the atmosphere (TCEQ, 2015). The cis-2-butene and trans-2-butene are released into the ambient air from the combustion of fossil fuels and loss from gas plants (TCEQ, 2013). The profile of trans-2-pentene, butane, and cis-2-pentene in this study is similar to the profile of trans-2-pentene (40%), butane (30%), and cis-2-pentene (50%) in traffic-related sources (Chen et al., 2014).

The fourth-highest contributing factor was diesel exhaust, which accounted for 12% of the total ambient VOC concentrations. This factor is dominated by high loadings of trans-2-octene (100%), trans-3-methyl-2-pentene (67%), methylcyclohexane (49%), octane (43%), nonane (42%), and decane (40%), and moderate loadings of cis-2-hexene (37%), heptane (35%), and 1,2,4-trimethylbenzene (34%). Decane is abundant in diesel exhaust (Chen et al., 2019). High proportions of nonane, 1,2,4-Trimethylbenzene, and octane were reported in the USPEA source profile of diesel exhaust (profile code: 4742, USEPA, 2022).

Each of the next two factors, labelled as solvent usage and chemical process and combustion, contributed to 8% of the ambient VOC concentrations. The solvent usage factor is characterized by high loadings of 1,1-dichloroethylene (64%), toluene (48%), a-pinene (44%), d-limonene (44%), and 1,4-dichlorobenzene (39%), and moderate loadings of m and p-xylene (33%), o-xylene (31%), and ethylbenzene (30%). Dichloroethene is used as a solvent for waxes, resins, acetylcellulose, perfumes, dyes, lacquers, thermoplastics, fats, and phenols (Government of Canada, 2013). The a-pinene (44%), b-pinene (35%), and d-limonene (44%) are fragrance compounds (Lab Effects, 2023). The factor profile of toluene, ethylbenzene, and xylene in this study is similar to the profile of toluene (40%), ethylbenzene (30%), and xylene (40%) in terms of solvent usage (Baudic et al., 2016).

The chemical process and combustion factor are dominated by high loadings of trichloroethylene (56%), hexane (50%), and benzylchloride (41%), and moderate loadings of cis-3-methyl-2-pentene (38%) and methylcyclopentane (37%). Trichloroethylene is used as a solvent to remove grease from metal parts and as a chemical that is used to make chemicals. The factor profile of hexane and methylcyclopentane in this study is similar to the profile of hexane (58%) and methylcyclopentane (44%) in chemical processes (Su et al., 2019). Benzylchloride is a marker of electricity generation via combustion (NEI, 2017).

The lowest contribution factor was a biogenic source, which only accounted for 3% of the total ambient VOC concentrations. This factor is characterized by the high loading of isoprene (87%) and low loadings of b-pinene (17%), a-pinene (11%), and d-limonene (11%). Isoprene is known as a chemical marker of biogenic emissions (Baudic et al., 2016). A-pinene and b-pinene are two isomers found in nature, e.g., in pine essential oils (Salehi et al., 2019). The profile of isoprene in this study is similar to that of a biogenic source reported by Baudic et al. (2016).

It should be noted that PMF modeling may not be able to differentiate between certain factors. For example, the PMF was unable to differentiate commercial cooking as a standalone factor in this study, even though it has been noted in other recent urban studies (Wang, H. et al., 2017; Lin, X.B. et al. 2022). The proximity of measurement sites to commercial cooking districts in urban areas may play a role. Concentrations of VOC species related to commercial cooking, such as ethane and ethylene, could be reflected in some of the nine factors resolved in this study, thereby leading to overestimated contributions of other factors.

Canada Energy Regulator (CER), 2022. What is in a Canadian residential natural gas bill? <https://www.cer-rec.gc.ca/en/data-analysis/energy-commodities/natural-gas/report/canadian-residential-natural-gasbill/index.html>. Last accessed on June 15, 2023.

Wang, L., Zhiyuan Xiang, Svetlana Stevanovic, Zoran Ristovski, Farhad Salimi, Jun Gao, Hongli Wang, Li Li, Role of Chinese cooking emissions on ambient air quality and human health, *Science of The Total Environment*, Volume 589, 2017, Pages 173-181, ISSN 0048-9697, <https://doi.org/10.1016/j.scitotenv.2017.02.124>.

Pengchuan Lin, Jian Gao, Yisheng Xu, James J. Schauer, Jiaqi Wang, Wanqing He, Lei Nie, Enhanced commercial cooking inventories from the city scale through normalized emission factor dataset and big data, *Environmental Pollution*, Volume 315, 2022, 120320, ISSN 0269-7491, <https://doi.org/10.1016/j.envpol.2022.120320>.

**Table S1.** TOG (total organic gas) speciation profile codes for subclass codes in the Ontario area emission inventory.

| Subclass Code | Subclass_Code_DESC                               | TOG Profile | Profile_DESC                                                                                        |
|---------------|--------------------------------------------------|-------------|-----------------------------------------------------------------------------------------------------|
| 50408         | General Solvent Use - Institutional & Government | 0000        | Overall Average                                                                                     |
| 50403         | General Solvent Use - Construction               | 1007        | Mineral Products - Asphaltic Concrete                                                               |
| 50402         | General Solvent Use - Natural Resources          | 1008        | Rubber and Miscellaneous Plastics Products - Fabricated Rubber Products - Styrene/Butadiene, Rubber |
| 50804         | Printing - Primary Industry                      | 1191        | Graphic Arts - (Printing)                                                                           |
| 50804         | Printing - Primary Industry                      | 1191        | Graphic Arts - (Printing)                                                                           |
| 51004         | Surface Coatings - Primary Industry              | 3138        | Aerosol Coatings: Coatings (Unspecified)                                                            |
| 51009         | Surface Coatings - Private Household (Consumer)  | 3140        | Architectural Coatings: Water Borne                                                                 |
| 50405         | General Solvent Use - Manufacturing & Assembly   | 3142        | Consumer Products Composite: Adhesives And Sealants                                                 |
| 50407         | General Solvent Use - Commercial Services        | 3144        | Consumer Products Composite: Solvents And Coating Related Products                                  |
| 50404         | General Solvent Use - Primary Industry           | 3144        | Consumer Products Composite: Solvents And Coating Related Products                                  |

|       |                                                    |      |                                                                           |
|-------|----------------------------------------------------|------|---------------------------------------------------------------------------|
| 50409 | General Solvent Use - Private Household (Consumer) | 3146 | Consumer Products Composite: Household Products                           |
| 50406 | General Solvent Use - Distribution & Retail        | 3147 | Consumer Products Composite: Personal Care Products                       |
| 51005 | Surface Coatings - Manufacturing & Assembly        | 3149 | Aerosol Coatings: Overall Composite                                       |
| 51006 | Surface Coatings - Distribution & Retail           | 3149 | Aerosol Coatings: Overall Composite                                       |
| 51006 | Surface Coatings - Distribution & Retail           | 3149 | Aerosol Coatings: Overall Composite                                       |
| 51003 | Surface Coatings - Construction                    | 8744 | Composite Profile - Architectural Coatings: Solvent-borne and Water-borne |

**Table S2.** Ontario 2015 non-mobile area emission inventory by subclass code, annual total = 226,075 tons (Note: only subclass codes with relatively large VOC emissions are listed).

| Species | Annual (tons) | Subclass Code | Subclass_Code_DESC                                       |
|---------|---------------|---------------|----------------------------------------------------------|
| VOC     | 38,199        | 50409         | General Solvent Use - Private Household (Consumer)       |
| VOC     | 24,228        | 20401         | Residential Fuel Wood Combustion                         |
| VOC     | 19,366        | 50405         | General Solvent Use - Manufacturing & Assembly           |
| VOC     | 12,491        | 50407         | General Solvent Use - Commercial Services                |
| VOC     | 12,144        | 20401         | Residential Fuel Wood Combustion                         |
| VOC     | 11,786        | 50404         | General Solvent Use - Primary Industry                   |
| VOC     | 9,671         | 51003         | Surface Coatings - Construction                          |
| VOC     | 8,437         | 20401         | Residential Fuel Wood Combustion                         |
| VOC     | 8,298         | 20401         | Residential Fuel Wood Combustion                         |
| VOC     | 6,557         | 50402         | General Solvent Use - Natural Resources                  |
| VOC     | 6,078         | 51005         | Surface Coatings - Manufacturing & Assembly              |
| VOC     | 5,800         | 50408         | General Solvent Use - Institutional & Government         |
| VOC     | 5,379         | 50403         | General Solvent Use - Construction                       |
| VOC     | 5,329         | 51004         | Surface Coatings - Primary Industry                      |
| VOC     | 4,625         | 50804         | Printing - Primary Industry                              |
| VOC     | 4,578         | 12210         | Bakeries                                                 |
| VOC     | 4,465         | 50701         | Refined Petroleum Products Retail                        |
| VOC     | 3,164         | 20401         | Residential Fuel Wood Combustion                         |
| VOC     | 3,056         | 51009         | Surface Coatings - Private Household (Consumer)          |
| VOC     | 2,922         | 50406         | General Solvent Use - Distribution & Retail              |
| VOC     | 2,908         | 20401         | Residential Fuel Wood Combustion                         |
| VOC     | 2,876         | 80701         | Landfills                                                |
| VOC     | 2,640         | 50701         | Refined Petroleum Products Retail                        |
| VOC     | 2,421         | 50701         | Refined Petroleum Products Retail                        |
| VOC     | 2,228         | 12108         | Refined Petroleum Products Bulk Storage and Distribution |
| VOC     | 2,003         | 20401         | Residential Fuel Wood Combustion                         |
| VOC     | 1,733         | 50701         | Refined Petroleum Products Retail                        |
| VOC     | 1,540         | 80901         | Prescribed Burning                                       |
| VOC     | 1,455         | 51301         | Off-road refueling                                       |

|                       |         |       |                                          |
|-----------------------|---------|-------|------------------------------------------|
| VOC                   | 1,310   | 51006 | Surface Coatings - Distribution & Retail |
| VOC                   | 1,229   | 80704 | Open Burning                             |
| VOC                   | 1,005   | 50603 | Commercial Cooking                       |
| VOC                   | 974     | 20301 | Residential Fuel Combustion              |
| VOC                   | 962     | 11902 | Panel Board Mills                        |
| Total VOC             | 226,075 |       |                                          |
| Solvent VOC           | 133,504 |       |                                          |
| Solvent/<br>Total_VOC | 59%     |       |                                          |

**Table S3.** Michigan projected 2017 inventory for solvent emissions (total solvent use VOC = 80,770 tons). TOG profile code is listed in the last column (Note: only SCCs with relatively large VOC emissions are listed).

| SCC        | VOC<br>(ton) | SCC_DESC                                                                                                                                  | TOG_Profile |
|------------|--------------|-------------------------------------------------------------------------------------------------------------------------------------------|-------------|
| 2401001000 | 11,605       | Solvent Utilization; Surface Coating; Architectural Coatings; Total: All Solvent Types                                                    | 8744        |
| 2460100000 | 9,382        | Solvent Utilization; Miscellaneous Non-industrial: Consumer and Commercial; All Personal Care Products; Total: All Solvent Types          | 3147        |
| 2460200000 | 8,889        | Solvent Utilization; Miscellaneous Non-industrial: Consumer and Commercial; All Household Products; Total: All Solvent Types              | 3146        |
| 2460800000 | 8,790        | Solvent Utilization; Miscellaneous Non-industrial: Consumer and Commercial; All FIFRA Related Products; Total: All Solvent Types          | 3145        |
| 2461850000 | 7,945        | Solvent Utilization; Miscellaneous Non-industrial: Commercial; Pesticide Application: Agricultural; All Processes                         | 3001        |
| 2460400000 | 6,716        | Solvent Utilization; Miscellaneous Non-industrial: Consumer and Commercial; All Automotive Aftermarket Products; Total: All Solvent Types | 8520        |
| 2460500000 | 4,691        | Solvent Utilization; Miscellaneous Non-industrial: Consumer and Commercial; All Coatings and Related Products; Total: All Solvent Types   | 3144        |
| 2415000000 | 4,471        | Solvent Utilization; Degreasing; All Processes/All Industries; Total: All Solvent Types                                                   | 8745        |
| 2401100000 | 2,978        | Solvent Utilization; Surface Coating; Industrial Maintenance Coatings; Total: All Solvent Types                                           | 3138        |
| 2460600000 | 2,815        | Solvent Utilization; Miscellaneous Non-industrial: Consumer and Commercial; All Adhesives and Sealants; Total: All Solvent Types          | 3142        |
| 2401025000 | 2,275        | Solvent Utilization; Surface Coating; Metal Furniture: SIC 25; Total: All Solvent Types                                                   | 2406        |
| 2401070000 | 1,903        | Solvent Utilization; Surface Coating; Motor Vehicles: SIC 371; Total: All Solvent Types                                                   | 3131        |

|            |       |                                                                                                                                                      |      |
|------------|-------|------------------------------------------------------------------------------------------------------------------------------------------------------|------|
| 2401005000 | 1,885 | Solvent Utilization; Surface Coating; Auto Refinishing; SIC 7532; Total: All Solvent Types                                                           | 2402 |
| 2461021000 | 1,599 | Solvent Utilization; Miscellaneous Non-industrial: Commercial; Cutback Asphalt; Total: All Solvent Types                                             | 1007 |
| 2461022000 | 947   | Solvent Utilization; Miscellaneous Non-industrial: Commercial; Emulsified Asphalt; Total: All Solvent Types                                          | 1007 |
| 2401020000 | 735   | Solvent Utilization; Surface Coating; Wood Furniture; SIC 25; Total: All Solvent Types                                                               | 2405 |
| 2401090000 | 694   | Solvent Utilization; Surface Coating; Miscellaneous Manufacturing; Total: All Solvent Types                                                          | 3149 |
| 2425000000 | 542   | Solvent Utilization; Graphic Arts; All Processes; Total: All Solvent Types                                                                           | 1191 |
| 2401040000 | 440   | Solvent Utilization; Surface Coating; Metal Cans; SIC 341; Total: All Solvent Types                                                                  | 2408 |
| 2460900000 | 346   | Solvent Utilization; Miscellaneous Non-industrial: Consumer and Commercial; Miscellaneous Products (Not Otherwise Covered); Total: All Solvent Types | 3144 |
| 2401055000 | 288   | Solvent Utilization; Surface Coating; Machinery and Equipment; SIC 35; Total: All Solvent Types                                                      | 3149 |
| 2401030000 | 288   | Solvent Utilization; Surface Coating; Paper; SIC 26; Total: All Solvent Types                                                                        | 2552 |
| 2401008000 | 178   | Solvent Utilization; Surface Coating; Traffic Markings; Total: All Solvent Types                                                                     | 3135 |
| 2401015000 | 162   | Solvent Utilization; Surface Coating; Factory Finished Wood; SIC 2426 thru 242; Total: All Solvent Types                                             | 2405 |
| 2401060000 | 56    | Solvent Utilization; Surface Coating; Large Appliances; SIC 363; Total: All Solvent Types                                                            | 2411 |
| 2401080000 | 46    | Solvent Utilization; Surface Coating; Marine; SIC 373; Total: All Solvent Types                                                                      | 2415 |
| 2401200000 | 32    | Solvent Utilization; Surface Coating; Other Special Purpose Coatings; Total: All Solvent Types                                                       | 3138 |
| 2401075000 | 23    | Solvent Utilization; Surface Coating; Aircraft; SIC 372; Total: All Solvent Types                                                                    | 2414 |
| 2401065000 | 18    | Solvent Utilization; Surface Coating; Electronic and Other Electrical; SIC 36 - 363; Total: All Solvent Types                                        | 3138 |
| 2420000000 | 17    | Solvent Utilization; Dry Cleaning; All Processes; Total: All Solvent Types                                                                           | 2422 |
| 2401085000 | 15    | Solvent Utilization; Surface Coating; Railroad; SIC 374; Total: All Solvent Types                                                                    | 2416 |

**Table S4.** TOG (total organic gas) speciation profiles mapped to GEM-MACH VOC speciation. Columns are profile number, TOG, GEM-MACH speciation, fraction of TOG, and molecular weight.

| PROFILE# | TOG | ADOMII-Species | Fraction_TOG | Molecular Weight |
|----------|-----|----------------|--------------|------------------|
| 0282     | TOG | EA3            | 1.47         | 93.43            |
| 0282     | TOG | EARO           | 0.13         | 117.97           |
| 1007     | TOG | EA2            | 0.02         | 57.3             |
| 1007     | TOG | EA3            | 0.46         | 93.43            |
| 1007     | TOG | EARO           | 0.32         | 117.97           |
| 1007     | TOG | EMEK           | 0.01         | 72.1             |
| 1008     | TOG | EA2            | 0.86         | 57.3             |
| 1008     | TOG | ETOL           | 0.35         | 92.13            |
| 1086     | TOG | EMEK           | 0.65         | 72.1             |
| 1086     | TOG | EOTH           | 0.42         | 100              |
| 1086     | TOG | ETOL           | 0.06         | 92.13            |
| 1191     | TOG | EA2            | 0.00         | 57.3             |
| 1191     | TOG | EA3            | 0.66         | 93.43            |
| 1191     | TOG | EARO           | 0.10         | 117.97           |
| 1191     | TOG | ECRE           | 0.00         | 108.13           |
| 1191     | TOG | EOTH           | 0.00         | 100              |
| 2402     | TOG | EA3            | 0.40         | 93.43            |
| 2402     | TOG | EARO           | 0.30         | 117.97           |
| 2402     | TOG | EC38           | 0.01         | 44.09            |
| 2402     | TOG | EMEK           | 0.14         | 72.1             |
| 2402     | TOG | EOTH           | 0.11         | 100              |
| 2402     | TOG | ETOL           | 0.13         | 92.13            |
| 2405     | TOG | EA3            | 0.50         | 93.43            |
| 2405     | TOG | EARO           | 0.17         | 117.97           |
| 2405     | TOG | EC38           | 0.01         | 44.09            |
| 2405     | TOG | EMEK           | 0.11         | 72.1             |
| 2405     | TOG | EOTH           | 0.07         | 100              |
| 2405     | TOG | ETOL           | 0.26         | 92.13            |
| 2406     | TOG | EA3            | 0.49         | 93.43            |
| 2406     | TOG | EARO           | 0.23         | 117.97           |
| 2406     | TOG | EC38           | 0.01         | 44.09            |
| 2406     | TOG | EMEK           | 0.07         | 72.1             |
| 2406     | TOG | EOTH           | 0.14         | 100              |
| 2406     | TOG | ETOL           | 0.10         | 92.13            |
| 2408     | TOG | EA3            | 0.61         | 93.43            |
| 2408     | TOG | EARO           | 0.14         | 117.97           |
| 2408     | TOG | EC38           | 0.00         | 44.09            |
| 2408     | TOG | EMEK           | 0.12         | 72.1             |
| 2408     | TOG | EOTH           | 0.07         | 100              |
| 2408     | TOG | ETOL           | 0.12         | 92.13            |
| 2409     | TOG | EA3            | 0.53         | 93.43            |
| 2409     | TOG | EARO           | 0.29         | 117.97           |
| 2409     | TOG | EC38           | 0.00         | 44.09            |
| 2409     | TOG | EMEK           | 0.07         | 72.1             |
| 2409     | TOG | EOTH           | 0.11         | 100              |
| 2409     | TOG | ETOL           | 0.08         | 92.13            |

|      |     |      |      |        |
|------|-----|------|------|--------|
| 2411 | TOG | EA3  | 0.49 | 93.43  |
| 2411 | TOG | EARO | 0.28 | 117.97 |
| 2411 | TOG | EMEK | 0.07 | 72.1   |
| 2411 | TOG | EOTH | 0.15 | 100    |
| 2411 | TOG | ETOL | 0.09 | 92.13  |
| 2414 | TOG | EA3  | 0.39 | 93.43  |
| 2414 | TOG | EARO | 0.07 | 117.97 |
| 2414 | TOG | EMEK | 0.12 | 72.1   |
| 2414 | TOG | EOTH | 0.38 | 100    |
| 2414 | TOG | ETOL | 0.18 | 92.13  |
| 2415 | TOG | EA3  | 0.35 | 93.43  |
| 2415 | TOG | EARO | 0.25 | 117.97 |
| 2415 | TOG | EC38 | 0.02 | 44.09  |
| 2415 | TOG | EMEK | 0.08 | 72.1   |
| 2415 | TOG | EOTH | 0.21 | 100    |
| 2415 | TOG | ETOL | 0.12 | 92.13  |
| 2416 | TOG | EA3  | 0.44 | 93.43  |
| 2416 | TOG | EARO | 0.15 | 117.97 |
| 2416 | TOG | EMEK | 0.11 | 72.1   |
| 2416 | TOG | EOTH | 0.06 | 100    |
| 2416 | TOG | ETOL | 0.25 | 92.13  |
| 2421 | TOG | EOTH | 0.60 | 100    |
| 2422 | TOG | EA3  | 0.59 | 93.43  |
| 2422 | TOG | EARO | 0.05 | 117.97 |
| 2422 | TOG | EOTH | 0.21 | 100    |
| 2543 | TOG | EA3  | 1.12 | 93.43  |
| 2543 | TOG | EARO | 0.10 | 117.97 |
| 2544 | TOG | EA3  | 1.12 | 93.43  |
| 2544 | TOG | EARO | 0.10 | 117.97 |
| 2545 | TOG | EA3  | 0.92 | 93.43  |
| 2545 | TOG | EARO | 0.07 | 117.97 |
| 2545 | TOG | EOTH | 0.04 | 100    |
| 2545 | TOG | ETOL | 0.25 | 92.13  |
| 2552 | TOG | EA3  | 0.20 | 93.43  |
| 2552 | TOG | EARO | 0.21 | 117.97 |
| 2552 | TOG | EC38 | 0.02 | 44.09  |
| 2552 | TOG | EOTH | 0.39 | 100    |
| 2552 | TOG | ETOL | 0.08 | 92.13  |
| 3001 | TOG | EA2  | 0.01 | 57.3   |
| 3001 | TOG | EA3  | 0.48 | 93.43  |
| 3001 | TOG | EARO | 0.01 | 117.97 |
| 3001 | TOG | EMEK | 0.01 | 72.1   |
| 3001 | TOG | EOTH | 0.45 | 100    |
| 3127 | TOG | EA3  | 0.16 | 93.43  |
| 3127 | TOG | EARO | 0.08 | 117.97 |
| 3127 | TOG | EC38 | 0.18 | 44.09  |
| 3127 | TOG | EMEK | 0.00 | 72.1   |
| 3127 | TOG | EOTH | 0.35 | 100    |
| 3127 | TOG | ETOL | 0.38 | 92.13  |



|      |     |      |      |        |
|------|-----|------|------|--------|
| 3131 | TOG | EA3  | 0.12 | 93.43  |
| 3131 | TOG | EARO | 0.15 | 117.97 |
| 3131 | TOG | EC38 | 0.11 | 44.09  |
| 3131 | TOG | EMEK | 0.01 | 72.1   |
| 3131 | TOG | EOTH | 0.94 | 100    |
| 3131 | TOG | ETOL | 0.12 | 92.13  |
| 3135 | TOG | EA3  | 0.33 | 93.43  |
| 3135 | TOG | EARO | 0.17 | 117.97 |
| 3135 | TOG | EC38 | 0.16 | 44.09  |
| 3135 | TOG | EMEK | 0.00 | 72.1   |
| 3135 | TOG | EOTH | 0.47 | 100    |
| 3135 | TOG | ETOL | 0.10 | 92.13  |
| 3137 | TOG | EA3  | 0.15 | 93.43  |
| 3137 | TOG | EARO | 0.03 | 117.97 |
| 3137 | TOG | EC38 | 0.11 | 44.09  |
| 3137 | TOG | EMEK | 0.10 | 72.1   |
| 3137 | TOG | EOTH | 0.56 | 100    |
| 3137 | TOG | ETOL | 0.23 | 92.13  |
| 3138 | TOG | EA2  | 0.00 | 57.3   |
| 3138 | TOG | EA3  | 0.35 | 93.43  |
| 3138 | TOG | EARO | 0.04 | 117.97 |
| 3138 | TOG | EC38 | 0.14 | 44.09  |
| 3138 | TOG | EMEK | 0.01 | 72.1   |
| 3138 | TOG | EOTH | 0.75 | 100    |
| 3138 | TOG | ETOL | 0.04 | 92.13  |
| 3139 | TOG | EA2  | 0.00 | 57.3   |
| 3139 | TOG | EA3  | 0.74 | 93.43  |
| 3139 | TOG | EARO | 0.12 | 117.97 |
| 3139 | TOG | EC38 | 0.00 | 44.09  |
| 3139 | TOG | ECRE | 0.00 | 108.13 |
| 3139 | TOG | EMEK | 0.03 | 72.1   |
| 3139 | TOG | EOTH | 0.06 | 100    |
| 3139 | TOG | ETOL | 0.04 | 92.13  |
| 3140 | TOG | EA2  | 0.00 | 57.3   |
| 3140 | TOG | EA3  | 1.02 | 93.43  |
| 3140 | TOG | EALD | 0.00 | 44.05  |
| 3140 | TOG | EARO | 0.01 | 117.97 |
| 3140 | TOG | EC38 | 0.03 | 44.09  |
| 3140 | TOG | EHCH | 0.00 | 30.03  |
| 3140 | TOG | EOTH | 0.08 | 100    |
| 3140 | TOG | ETOL | 0.00 | 92.13  |
| 3142 | TOG | EA2  | 0.00 | 57.3   |
| 3142 | TOG | EA3  | 0.67 | 93.43  |
| 3142 | TOG | EARO | 0.02 | 117.97 |
| 3142 | TOG | EC38 | 0.04 | 44.09  |
| 3142 | TOG | EMEK | 0.10 | 72.1   |
| 3142 | TOG | EOTH | 0.22 | 100    |
| 3142 | TOG | ETOL | 0.06 | 92.13  |
| 3144 | TOG | EA2  | 0.00 | 57.3   |

|      |     |      |      |        |
|------|-----|------|------|--------|
| 3144 | TOG | EA3  | 0.40 | 93.43  |
| 3144 | TOG | EARO | 0.07 | 117.97 |
| 3144 | TOG | EC38 | 0.07 | 44.09  |
| 3144 | TOG | ECRE | 0.01 | 108.13 |
| 3144 | TOG | EMEK | 0.02 | 72.1   |
| 3144 | TOG | EOTH | 0.54 | 100    |
| 3144 | TOG | ETOL | 0.05 | 92.13  |
| 3145 | TOG | EA3  | 0.92 | 93.43  |
| 3145 | TOG | EALD | 0.00 | 44.05  |
| 3145 | TOG | EARO | 0.06 | 117.97 |
| 3145 | TOG | EC38 | 0.05 | 44.09  |
| 3145 | TOG | EMEK | 0.00 | 72.1   |
| 3145 | TOG | EOTH | 0.12 | 100    |
| 3145 | TOG | ETOL | 0.00 | 92.13  |
| 3146 | TOG | EA2  | 0.01 | 57.3   |
| 3146 | TOG | EA3  | 0.81 | 93.43  |
| 3146 | TOG | EALD | 0.00 | 44.05  |
| 3146 | TOG | EARO | 0.03 | 117.97 |
| 3146 | TOG | EC38 | 0.06 | 44.09  |
| 3146 | TOG | ECRE | 0.00 | 108.13 |
| 3146 | TOG | EMEK | 0.00 | 72.1   |
| 3146 | TOG | EOTH | 0.14 | 100    |
| 3146 | TOG | ETOL | 0.00 | 92.13  |
| 3147 | TOG | EA2  | 0.00 | 57.3   |
| 3147 | TOG | EA3  | 1.13 | 93.43  |
| 3147 | TOG | EARO | 0.00 | 117.97 |
| 3147 | TOG | EC38 | 0.03 | 44.09  |
| 3147 | TOG | ECRE | 0.00 | 108.13 |
| 3147 | TOG | EMEK | 0.00 | 72.1   |
| 3147 | TOG | EOTH | 0.09 | 100    |
| 3147 | TOG | ETOL | 0.00 | 92.13  |
| 3149 | TOG | EA2  | 0.00 | 57.3   |
| 3149 | TOG | EA3  | 0.22 | 93.43  |
| 3149 | TOG | EARO | 0.12 | 117.97 |
| 3149 | TOG | EC38 | 0.14 | 44.09  |
| 3149 | TOG | EMEK | 0.03 | 72.1   |
| 3149 | TOG | EOTH | 0.66 | 100    |
| 3149 | TOG | ETOL | 0.12 | 92.13  |
| 8520 | TOG | EA2  | 0.00 | 57.3   |
| 8520 | TOG | EA3  | 0.37 | 93.43  |
| 8520 | TOG | EARO | 0.04 | 117.97 |
| 8520 | TOG | EC38 | 0.38 | 44.09  |
| 8520 | TOG | ECRE | 0.00 | 108.13 |
| 8520 | TOG | EMEK | 0.00 | 72.1   |
| 8520 | TOG | EOTH | 0.26 | 100    |
| 8520 | TOG | ETOL | 0.03 | 92.13  |
| 8744 | TOG | EA2  | 0.00 | 57.3   |
| 8744 | TOG | EA3  | 0.83 | 93.43  |
| 8744 | TOG | EALD | 0.00 | 44.05  |

|      |     |      |      |        |
|------|-----|------|------|--------|
| 8744 | TOG | EARO | 0.08 | 117.97 |
| 8744 | TOG | EC38 | 0.01 | 44.09  |
| 8744 | TOG | ECRE | 0.00 | 108.13 |
| 8744 | TOG | EHCH | 0.00 | 30.03  |
| 8744 | TOG | EMEK | 0.02 | 72.1   |
| 8744 | TOG | EOTH | 0.07 | 100    |
| 8744 | TOG | ETOL | 0.03 | 92.13  |
| 8745 | TOG | EA2  | 0.04 | 57.3   |
| 8745 | TOG | EA3  | 0.43 | 93.43  |
| 8745 | TOG | EALD | 0.00 | 44.05  |
| 8745 | TOG | EARO | 0.08 | 117.97 |
| 8745 | TOG | EC38 | 0.04 | 44.09  |
| 8745 | TOG | ECRE | 0.00 | 108.13 |
| 8745 | TOG | EMEK | 0.00 | 72.1   |
| 8745 | TOG | EOTH | 0.36 | 100    |
| 8745 | TOG | ETOL | 0.05 | 92.13  |

**Table S5.** Michigan 2017 inventory for solvent emissions (total solvent use VOC = 112,230 tons) with TOG profiles.

| SCC        | poll | annual<br>(tons) | TOG_Profi<br>le | SCC_DESC                                                                                                                                                                       | Profile_DESC                                     |
|------------|------|------------------|-----------------|--------------------------------------------------------------------------------------------------------------------------------------------------------------------------------|--------------------------------------------------|
| 2460110000 | TOG  | 22,332           | MYR_SPC<br>PD   | Solvent<br>Utilization;<br>Miscellaneous<br>Non-industrial:<br>Consumer and<br>Commercial;<br>Personal Care<br>Products: Hair<br>Care Products;<br>Total: All<br>Solvent Types | Time Series Solvents -<br>PCP_Daily_Use_Products |
| 2401100000 | TOG  | 21,563           | MYR_SCO<br>IN   | Solvent<br>Utilization;<br>Surface Coating;<br>Industrial<br>Maintenance<br>Coatings; Total:<br>All Solvent<br>Types                                                           | Time Series Solvents -<br>COAT_Industrial        |
| 2460290000 | TOG  | 20,319           | MYR_SCP<br>G    | Solvent<br>Utilization;<br>Miscellaneous<br>Non-industrial:<br>Consumer and<br>Commercial;<br>Household<br>Products;<br>Miscellaneous<br>Household                             | Time Series Solvents -<br>CP_General_Cleaners    |

|                |        |               |                                                                                                                                                                       |                                                 |
|----------------|--------|---------------|-----------------------------------------------------------------------------------------------------------------------------------------------------------------------|-------------------------------------------------|
|                |        |               | <b>Products; Total:<br/>All Solvent<br/>Types</b>                                                                                                                     |                                                 |
| 2402000000 TOG | 10,639 | MYR_SCO<br>AL | Solvent<br>Utilization;<br>Paint Strippers;<br>Chemical<br>Strippers;<br>Application,<br>Degradation,<br>and Coating<br>Removal Steps:<br>Others Not<br>Listed        | Time Series Solvents -<br>COAT_Allied           |
| 2401001000 TOG | 9,819  | MYR_SCO<br>AR | Solvent<br>Utilization;<br>Surface Coating;<br>Architectural<br>Coatings; Total:<br>All Solvent<br>Types                                                              | Time Series Solvents -<br>COAT_Architectural    |
| 2425000000 TOG | 9,737  | MYR_SPI       | Solvent<br>Utilization;<br>Graphic Arts;<br>All Processes;<br>Total: All<br>Solvent Types                                                                             | Time Series Solvents -<br>PI_Printing_Inks      |
| 2460600000 TOG | 8,382  | MYR_SAS       | Solvent<br>Utilization;<br>Miscellaneous<br>Non-industrial:<br>Consumer and<br>Commercial; All<br>Adhesives and<br>Sealants; Total:<br>All Solvent<br>Types           | Time Series Solvents -<br>AS_Adhesives_Sealants |
| 2460500000 TOG | 3,205  | MYR_SCO<br>AE | Solvent<br>Utilization;<br>Miscellaneous<br>Non-industrial:<br>Consumer and<br>Commercial; All<br>Coatings and<br>Related<br>Products; Total:<br>All Solvent<br>Types | Time Series Solvents -<br>COAT_Aerosol          |
| 2461850000 TOG | 2,960  | MYR_SPE<br>A  | Solvent<br>Utilization;<br>Miscellaneous                                                                                                                              | Time Series Solvents -<br>PEST_Agricultural     |

|                |       |               |                                                                                                                                                                                                        |                                                  |
|----------------|-------|---------------|--------------------------------------------------------------------------------------------------------------------------------------------------------------------------------------------------------|--------------------------------------------------|
|                |       |               | Non-industrial:<br>Commercial;<br>Pesticide<br>Application:<br>Agricultural; All<br>Processes                                                                                                          |                                                  |
| 2460200000 TOG | 1,310 | MYR_SCP<br>D  | Solvent<br>Utilization;<br>Miscellaneous<br>Non-industrial:<br>Consumer and<br>Commercial; All<br>Household<br>Products; Total:<br>All Solvent<br>Types                                                | Time Series Solvents -<br>CP_Detergents_Soaps    |
| 2461800000 TOG | 821   | MYR_SPE<br>F  | Solvent<br>Utilization;<br>Miscellaneous<br>Non-industrial:<br>Commercial;<br>Pesticide<br>Application: All<br>Processes; Total:<br>All Solvent<br>Types                                               | Time Series Solvents -<br>PEST_FIFRA             |
| 2477777777 TOG | 388   | MYR_SOG       | Fake SCC<br>temporarily used<br>for OG_Oil_Gas                                                                                                                                                         | Time Series Solvents -<br>OG_Oil_Gas             |
| 2460190000 TOG | 255   | MYR_SPC<br>PS | Solvent<br>Utilization;<br>Miscellaneous<br>Non-industrial:<br>Consumer and<br>Commercial;<br>Personal Care<br>Products;<br>Miscellaneous<br>Personal Care<br>Products; Total:<br>All Solvent<br>Types | Time Series Solvents -<br>PCP_Short_Use_Products |
| 2460100000 TOG | 220   | MYR_SFL       | Solvent<br>Utilization;<br>Miscellaneous<br>Non-industrial:<br>Consumer and<br>Commercial; All<br>Personal Care<br>Products; Total:                                                                    | Time Series Solvents -<br>FL_Fuels_Lighter       |

|                |     |         |                                                                                                                                                                                       |                                           |
|----------------|-----|---------|---------------------------------------------------------------------------------------------------------------------------------------------------------------------------------------|-------------------------------------------|
| 2460900000 TOG | 188 | MYR_SM  | All Solvent<br>Types                                                                                                                                                                  | Time Series Solvents -<br>Misc_All        |
|                |     |         | Solvent<br>Utilization;<br>Miscellaneous<br>Non-industrial:<br>Consumer and<br>Commercial;<br>Miscellaneous<br>Products (Not<br>Otherwise<br>Covered); Total:<br>All Solvent<br>Types |                                           |
| 2420000000 TOG | 90  | MYR_SDC | Solvent<br>Utilization; Dry<br>Cleaning; All<br>Processes; Total:<br>All Solvent<br>Types                                                                                             | Time Series Solvents -<br>DC_Dry_Cleaning |
|                |     |         |                                                                                                                                                                                       |                                           |

**Table S6.** TOG chemical profiles used to process the 2017 US VCPy solvent emissions.

| PROFILE#  | TOG | ADOMII-Species | Fraction_TOG | Molecular Weight |
|-----------|-----|----------------|--------------|------------------|
| MYR_SAS   | TOG | EA3            | 0.733323163  | 93.43            |
| MYR_SAS   | TOG | EA2            | 0.016017847  | 57.3             |
| MYR_SAS   | TOG | EARO           | 0.046988721  | 117.97           |
| MYR_SAS   | TOG | EC38           | 0.02603509   | 44.09            |
| MYR_SAS   | TOG | EMEK           | 0.009936941  | 72.1             |
| MYR_SAS   | TOG | EOTH           | 0.123205392  | 100              |
| MYR_SAS   | TOG | ETOL           | 0.031528846  | 92.13            |
| MYR_SCOAE | TOG | EA3            | 0.207665547  | 93.43            |
| MYR_SCOAE | TOG | EA2            | 9.34E-05     | 57.3             |
| MYR_SCOAE | TOG | EARO           | 0.115081632  | 117.97           |
| MYR_SCOAE | TOG | EC38           | 0.139465948  | 44.09            |
| MYR_SCOAE | TOG | EMEK           | 0.024617283  | 72.1             |
| MYR_SCOAE | TOG | EOTH           | 0.695011256  | 100              |
| MYR_SCOAE | TOG | ETOL           | 0.122630921  | 92.13            |
| MYR_SCOAL | TOG | EA3            | 0.539414305  | 93.43            |
| MYR_SCOAL | TOG | EA2            | 0.000948982  | 57.3             |
| MYR_SCOAL | TOG | EARO           | 0.045254128  | 117.97           |
| MYR_SCOAL | TOG | EC38           | 0.070819509  | 44.09            |
| MYR_SCOAL | TOG | ECRE           | 0.000178041  | 108.13           |
| MYR_SCOAL | TOG | EMEK           | 0.025944081  | 72.1             |
| MYR_SCOAL | TOG | EOTH           | 0.354409119  | 100              |
| MYR_SCOAL | TOG | ETOL           | 0.056363498  | 92.13            |
| MYR_SCOAR | TOG | EALD           | 0.000277392  | 44.05            |
| MYR_SCOAR | TOG | EA3            | 1.003428222  | 93.43            |
| MYR_SCOAR | TOG | EARO           | 0.014809182  | 117.97           |
| MYR_SCOAR | TOG | EC38           | 0.014564934  | 44.09            |
| MYR_SCOAR | TOG | ECRE           | 0.000492395  | 108.13           |

|           |     |      |             |        |
|-----------|-----|------|-------------|--------|
| MYR_SCOAR | TOG | EMEK | 0.00139957  | 72.1   |
| MYR_SCOAR | TOG | EOTH | 0.089530707 | 100    |
| MYR_SCOAR | TOG | ETOL | 0.002529788 | 92.13  |
| MYR_SCOIN | TOG | EA3  | 0.221629133 | 93.43  |
| MYR_SCOIN | TOG | EA2  | 0.00033605  | 57.3   |
| MYR_SCOIN | TOG | EARO | 0.115652056 | 117.97 |
| MYR_SCOIN | TOG | EC38 | 0.140017673 | 44.09  |
| MYR_SCOIN | TOG | EMEK | 0.026840116 | 72.1   |
| MYR_SCOIN | TOG | EOTH | 0.667832316 | 100    |
| MYR_SCOIN | TOG | ETOL | 0.128877524 | 92.13  |
| MYR_SCPD  | TOG | EA3  | 1.320039998 | 93.43  |
| MYR_SCPD  | TOG | EC38 | 0.047807357 | 44.09  |
| MYR_SCPD  | TOG | EOTH | 0.001746614 | 100    |
| MYR_SCPG  | TOG | EALD | 0.000184691 | 44.05  |
| MYR_SCPG  | TOG | EA3  | 0.7276893   | 93.43  |
| MYR_SCPG  | TOG | EA2  | 0.00557166  | 57.3   |
| MYR_SCPG  | TOG | EARO | 0.010926479 | 117.97 |
| MYR_SCPG  | TOG | EC38 | 0.058876831 | 44.09  |
| MYR_SCPG  | TOG | ECRE | 0.000538604 | 108.13 |
| MYR_SCPG  | TOG | EMEK | 0.000639401 | 72.1   |
| MYR_SCPG  | TOG | EOTH | 0.31880654  | 100    |
| MYR_SCPG  | TOG | ETOL | 0.025911144 | 92.13  |
| MYR_SDC   | TOG | EA3  | 0.889130076 | 93.43  |
| MYR_SDC   | TOG | EOTH | 0.24704855  | 100    |
| MYR_SFL   | TOG | EA3  | 0.784210859 | 93.43  |
| MYR_SFL   | TOG | EA2  | 0.016224379 | 57.3   |
| MYR_SFL   | TOG | EARO | 0.003547072 | 117.97 |
| MYR_SFL   | TOG | EC38 | 0.054396119 | 44.09  |
| MYR_SFL   | TOG | EOTH | 0.039260984 | 100    |
| MYR_SFL   | TOG | ETOL | 0.000240313 | 92.13  |
| MYR_SM    | TOG | EA3  | 1.115323416 | 93.43  |
| MYR_SM    | TOG | EARO | 0.046790957 | 117.97 |
| MYR_SM    | TOG | EC38 | 0.000869838 | 44.09  |
| MYR_SM    | TOG | ECRE | 0.001398434 | 108.13 |
| MYR_SM    | TOG | EMEK | 0.03950523  | 72.1   |
| MYR_SM    | TOG | EOTH | 0.061197857 | 100    |
| MYR_SM    | TOG | ETOL | 0.009007564 | 92.13  |
| MYR_SOG   | TOG | EA3  | 0.305636651 | 93.43  |
| MYR_SOG   | TOG | EARO | 0.016078263 | 117.97 |
| MYR_SOG   | TOG | EC38 | 0.697638339 | 44.09  |
| MYR_SOG   | TOG | EMEK | 0.002713681 | 72.1   |
| MYR_SOG   | TOG | EOTH | 0.02994298  | 100    |
| MYR_SOG   | TOG | ETOL | 0.020736925 | 92.13  |
| MYR_SPCPD | TOG | EA3  | 0.988240192 | 93.43  |
| MYR_SPCPD | TOG | EA2  | 0.000436448 | 57.3   |
| MYR_SPCPD | TOG | EARO | 0.002876789 | 117.97 |
| MYR_SPCPD | TOG | EC38 | 0.007872236 | 44.09  |
| MYR_SPCPD | TOG | ECRE | 0.00538276  | 108.13 |
| MYR_SPCPD | TOG | EOTH | 0.166693676 | 100    |

|           |     |      |             |        |
|-----------|-----|------|-------------|--------|
| MYR_SPCPD | TOG | ETOL | 0.001313152 | 92.13  |
| MYR_SPCPS | TOG | EA3  | 1.043227461 | 93.43  |
| MYR_SPCPS | TOG | EC38 | 0.039048871 | 44.09  |
| MYR_SPCPS | TOG | EMEK | 0.000702685 | 72.1   |
| MYR_SPCPS | TOG | EOTH | 0.180497722 | 100    |
| MYR_SPEA  | TOG | EA3  | 0.787034444 | 93.43  |
| MYR_SPEA  | TOG | EA2  | 0.000767638 | 57.3   |
| MYR_SPEA  | TOG | EARO | 0.01294589  | 117.97 |
| MYR_SPEA  | TOG | EC38 | 0.100627723 | 44.09  |
| MYR_SPEA  | TOG | EMEK | 0.001204033 | 72.1   |
| MYR_SPEA  | TOG | EOTH | 0.063546284 | 100    |
| MYR_SPEA  | TOG | ETOL | 0.001301904 | 92.13  |
| MYR_SPEF  | TOG | EA3  | 0.787034444 | 93.43  |
| MYR_SPEF  | TOG | EA2  | 0.000767638 | 57.3   |
| MYR_SPEF  | TOG | EARO | 0.01294589  | 117.97 |
| MYR_SPEF  | TOG | EC38 | 0.100627723 | 44.09  |
| MYR_SPEF  | TOG | EMEK | 0.001204033 | 72.1   |
| MYR_SPEF  | TOG | EOTH | 0.063546284 | 100    |
| MYR_SPEF  | TOG | ETOL | 0.001301904 | 92.13  |
| MYR_SPI   | TOG | EA3  | 0.501433771 | 93.43  |
| MYR_SPI   | TOG | EARO | 0.091057857 | 117.97 |
| MYR_SPI   | TOG | EC38 | 0.016001792 | 44.09  |
| MYR_SPI   | TOG | EMEK | 0.095921649 | 72.1   |
| MYR_SPI   | TOG | EOTH | 0.068683061 | 100    |
| MYR_SPI   | TOG | ETOL | 0.131450438 | 92.13  |

**Table S7.** OH-rate coefficients at 300 K for the 107 measured VOCs.

| VOC Species               | OH-rate coefficients at 300 K                                |                           |
|---------------------------|--------------------------------------------------------------|---------------------------|
|                           | (cm <sup>3</sup><br>molecule <sup>-1</sup> s <sup>-1</sup> ) | References                |
| 1,1,1-Trichloroethane     | 1.24E-14                                                     | Carter, 2010              |
| 1,1,2,2-Tetrachloroethane | 1.26E-13                                                     | UNEP, 2002                |
| 1,1,2-Trichloroethane     | 2.00E-13                                                     | Carter, 2010              |
| 1,1-Dichloroethane        | 2.60E-13                                                     | Carter, 2010              |
| 1,1-Dichloroethylene      | 1.12E-11                                                     | Zhang et al., 1991        |
| 1,2,3-Trimethylbenzene    | 3.27E-11                                                     | Carter, 2010              |
| 1,2,4-Trichlorobenzene    | 5.00E-13                                                     | Rinke and Zetzsch, 1984   |
| 1,2,4-Trimethylbenzene    | 3.25E-11                                                     | Carter, 2010              |
| 1,2-Dichlorobenzene       | 6.20E-13                                                     | Pfannerstill et al., 2019 |
| 1,2-Dichloroethane        | 2.53E-13                                                     | Carter, 2010              |
| 1,2-Dichloropropane       | 4.50E-13                                                     | Carter, 2010              |
| 1,3,5-Trimethylbenzene    | 5.67E-11                                                     | Carter, 2010              |
| 1,3-Butadiene             | 6.59E-11                                                     | Carter, 2010              |
| 1,3-Dichlorobenzene       | 6.20E-13                                                     | Pfannerstill et al., 2019 |
| 1,3-Diethylbenzene        | 2.20E-11                                                     | Shaw et al., 2020         |
| 1,4-Dichlorobenzene       | 5.55E-13                                                     | Carter, 2010              |
| 1,4-Diethylbenzene        | 1.60E-11                                                     | Shaw et al., 2020         |
| 1-Butene/Isobutene        | 5.08E-11                                                     | Carter, 2010              |
| 1-Heptene                 | 4.00E-11                                                     | Carter, 2010              |



|                             |          |                           |
|-----------------------------|----------|---------------------------|
| 1-Hexene/2-Methyl-1-Pentene | 3.70E-11 | Carter, 2010              |
| 1-Pentene                   | 3.14E-11 | Carter, 2010              |
| 2,2,4-Trimethylpentane      | 3.38E-12 | Carter, 2010              |
| 2,2-Dimethylbutane          | 5.95E-12 | Permar et al., 2023       |
| 2,3,4-Trimethylpentane      | 6.60E-12 | Carter, 2010              |
| 2,3-Dimethylbutane          | 6.00E-12 | Heimann and Warneck, 1992 |
| 2,3-Dimethylpentane         | 7.15E-12 | Carter, 2010              |
| 2,4-Dimethylhexane          | 8.57E-12 | Carter, 2010              |
| 2,4-Dimethylpentane         | 4.77E-12 | Carter, 2010              |
| 2,5-Dimethylhexane          | 8.29E-12 | Carter, 2010              |
| 2-Ethyltoluene              | 1.19E-11 | Carter, 2010              |
| 2-Methyl-1-butene           | 6.10E-11 | Carter, 2010              |
| 2-Methyl-2-butene           | 8.60E-11 | Carter, 2010              |
| 2-Methylheptane             | 8.31E-12 | Carter, 2010              |
| 2-Methylhexane              | 6.70E-12 | Permar et al., 2023       |
| 2-Methylpentane             | 5.20E-12 | Carter, 2010              |
| 3-Ethyltoluene              | 1.86E-11 | Carter, 2010              |
| 3-Methyl-1-Butene           | 3.14E-11 | Carter, 2010              |
| 3-Methylheptane             | 8.59E-12 | Carter, 2010              |
| 3-Methylhexane              | 6.30E-12 | Permar et al., 2023       |
| 3-Methylpentane             | 5.20E-12 | Carter, 2010              |
| 4-Ethyltoluene              | 1.18E-11 | Carter, 2010              |
| 4-Methylheptane             | 8.59E-12 | Carter, 2010              |
| Acetylene                   | 7.56E-13 | Carter, 2010              |
| A-Pinene                    | 5.18E-11 | Carter, 2010              |
| Benzene                     | 1.22E-12 | Carter, 2010              |
| Benzylchloride              | 2.80E-12 | Tuazon et al., 1990       |
| B-Pinene                    | 7.35E-11 | Carter, 2010              |
| Bromoform                   | 2.71E-13 | Orkin et al., 2013        |
| Bromomethane                | 4.12E-14 | Carter, 2010              |
| Butane                      | 2.38E-12 | Carter, 2010              |
| Camphene                    | 1.63E-10 | Permar et al., 2023       |
| Carbontetrachloride         |          | Not found                 |
| Chlorobenzene               | 7.70E-13 | Carter, 2010              |
| Chloroethane                | 4.18E-13 | Carter, 2010              |
| Chloroform                  | 1.06E-13 | Carter, 2010              |
| Chloromethane               | 4.48E-14 | Carter, 2010              |
| cis-1,2-Dimethylcyclohexane | 1.19E-11 | Carter, 2010              |
| cis-2-Butene                | 5.58E-11 | Carter, 2010              |
| cis-2-Hexene                | 6.60E-11 | Carter, 2010              |
| cis-2-Pentene               | 6.50E-11 | Carter, 2010              |
| cis-3-Methyl-2-Pentene      | 8.85E-11 | Carter, 2010              |
| Cyclohexane                 | 7.02E-12 | Carter, 2010              |
| Cyclopentane                | 5.02E-12 | Carter, 2010              |
| Decane                      | 1.10E-11 | Carter, 2010              |
| Dichloromethane             | 1.45E-13 | Carter, 2010              |
| D-Limonene                  | 1.63E-10 | Carter, 2010              |

|                          |          |                     |
|--------------------------|----------|---------------------|
| Dodecane                 | 1.32E-11 | Carter, 2010        |
| Ethane                   | 2.54E-13 | Carter, 2010        |
| Ethylbenzene             | 7.00E-12 | Carter, 2010        |
| Ethylene                 | 8.15E-12 | Carter, 2010        |
| Freon 11                 |          | Not found           |
| Freon 114                |          | Not found           |
| Freon 12                 |          | Not found           |
| Freon 22                 |          | Not found           |
| Heptane                  | 6.81E-12 | Carter, 2010        |
| Hexachlorobutadiene      | 2.60E-11 | Carter, 2010        |
| Hexane                   | 5.25E-12 | Carter, 2010        |
| Indane                   | 5.04E-11 | Permar et al., 2023 |
| Isobutane                | 2.14E-12 | Carter, 2010        |
| Isopentane               | 3.60E-12 | Carter, 2010        |
| Isoprene                 | 9.96E-11 | Carter, 2010        |
| Iso-Propylbenzene        | 6.30E-12 | Carter, 2010        |
| m and p-Xylene           | 2.31E-11 | Carter, 2010        |
| Methylcyclohexane        | 9.64E-12 | Carter, 2010        |
| Methylcyclopentane       | 5.68E-12 | Carter, 2010        |
| MTBE                     | 2.79E-12 | Iuga et al., 2015   |
| Naphthalene              | 2.30E-11 | Carter, 2010        |
| Nonane                   | 9.75E-12 | Carter, 2010        |
| n-Propylbenzene          | 5.80E-12 | Carter, 2010        |
| Octane                   | 8.16E-12 | Carter, 2010        |
| o-Xylene                 | 1.36E-11 | Carter, 2010        |
| p-Cymene                 | 1.45E-11 | Carter, 2010        |
| Pentane                  | 3.84E-12 | Carter, 2010        |
| Propane                  | 1.11E-12 | Carter, 2010        |
| Propylene                | 2.60E-11 | Carter, 2010        |
| Styrene                  | 5.80E-11 | Carter, 2010        |
| Tetrachloroethylene      |          | Not found           |
| Toluene                  | 5.58E-12 | Carter, 2010        |
| trans-2-Butene           | 6.32E-11 | Carter, 2010        |
| trans-2-Hexene           | 6.60E-11 | Carter, 2010        |
| trans-2-Octene           | 6.89E-11 | Carter, 2010        |
| trans-2-Pentene          | 6.70E-11 | Carter, 2010        |
| trans-3-Methyl-2-Pentene | 8.85E-11 | Carter, 2010        |
| trans-4-Methyl-2-Pentene | 5.98E-11 | Carter, 2010        |
| Trichloroethylene        | 2.34E-12 | Carter, 2010        |
| Undecane                 | 1.23E-11 | Carter, 2010        |
| Vinylchloride            | 6.90E-12 | Carter, 2010        |

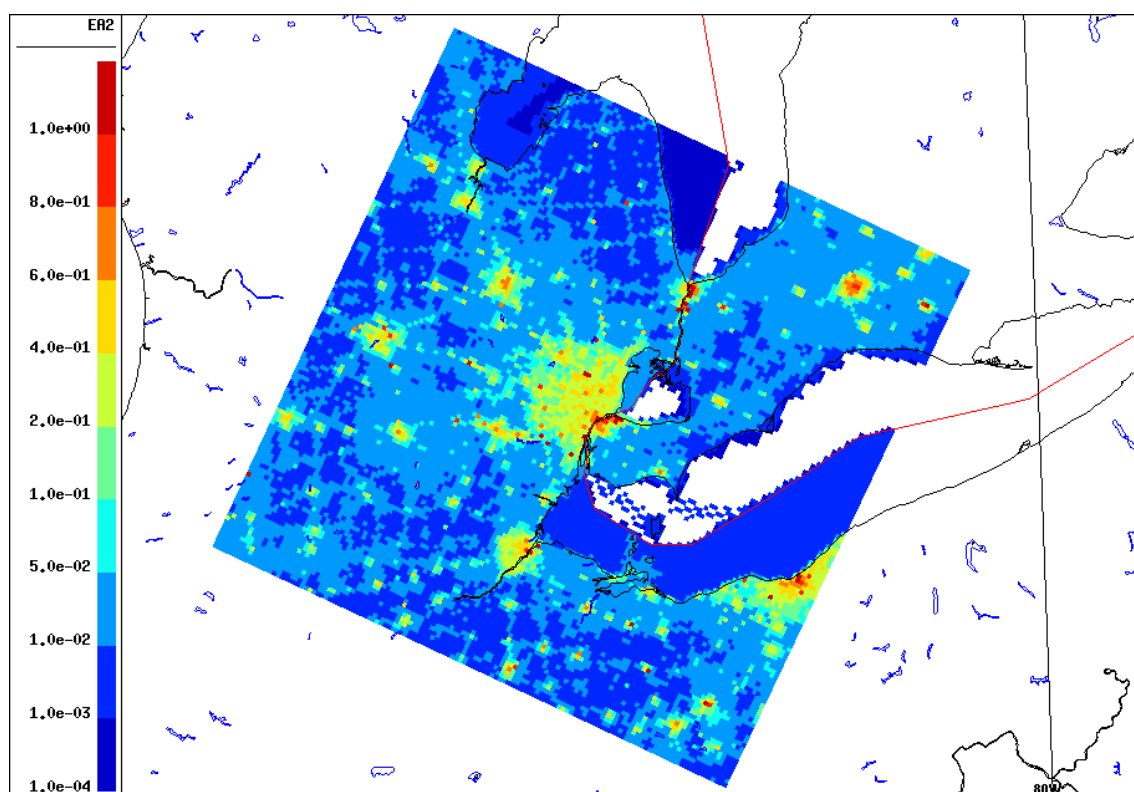

**Figure S1.** Windsor/Detroit border domain for emission characterization. Alkene emission rate in grams/sec is shown for illustrative purposes. In total, 25% of land cover area is Canadian and 75% US.

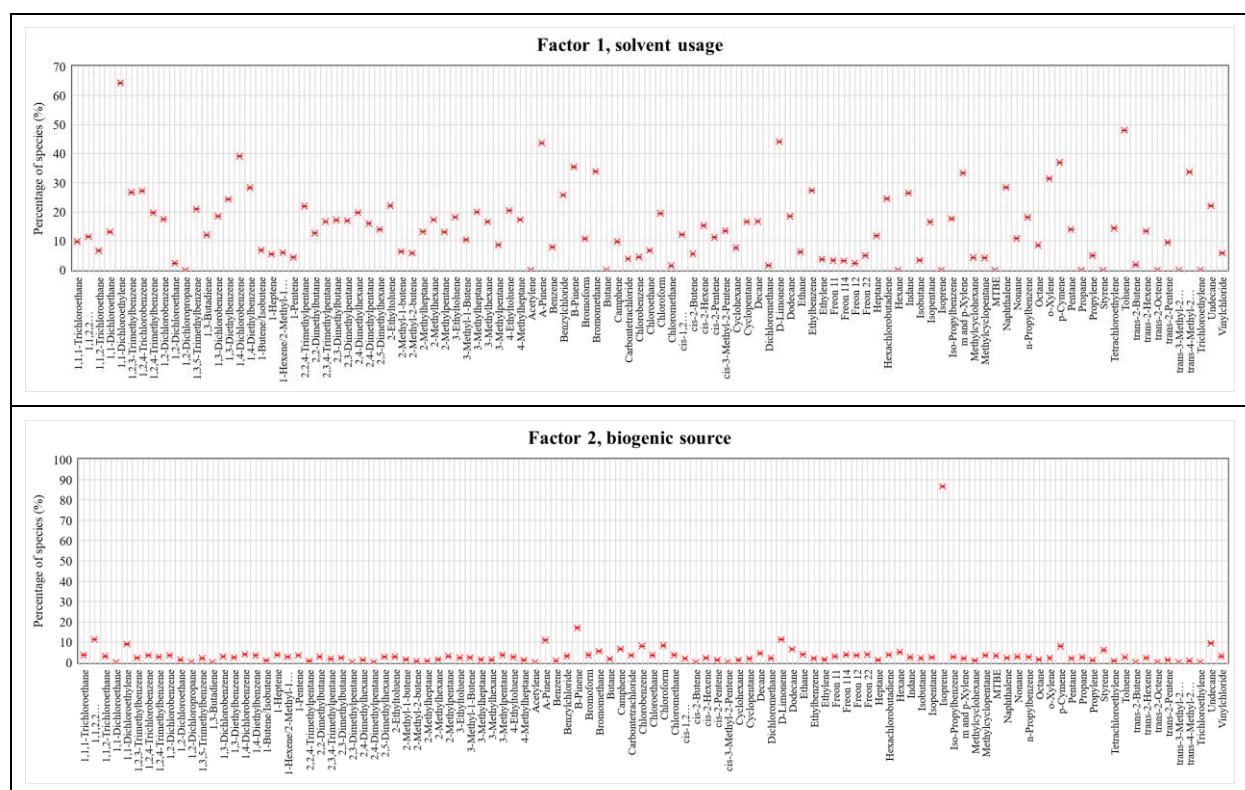

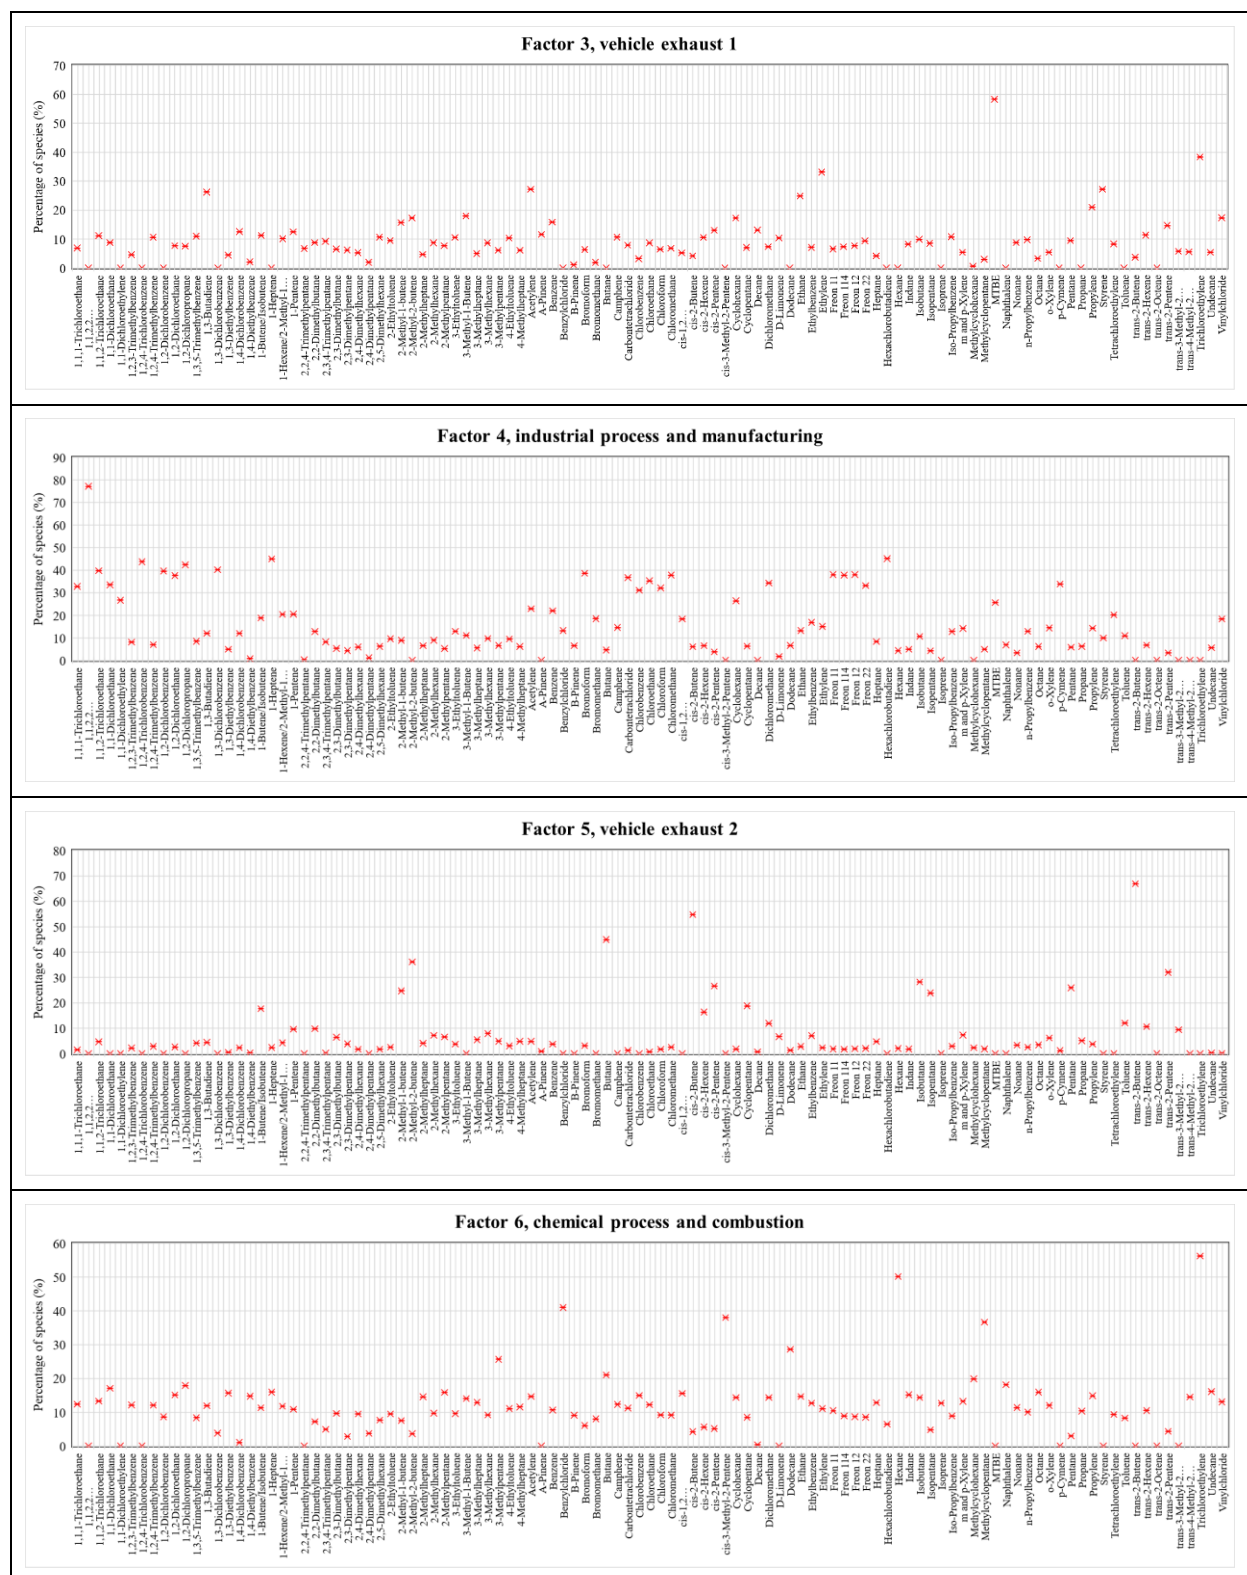

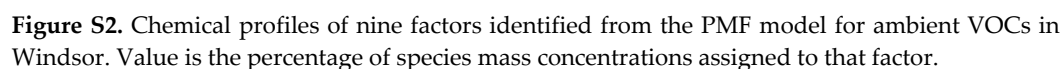

Supplement: s1 [file s1]
